# Supplementary material for: Long non-coding RNA ATB promotes human non-small cell lung cancer proliferation and metastasis by suppressing miR-141-3p
Source: PubMed Central journal article supplement (PMC7039450; doi:10.1371/journal.pone.0229118), 2020-02-24

**Fig. 3E. E-cadherin**

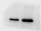

**Fig. 3E N-cadherin**

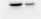

**Fig. 3E N-cadherin overexposure**

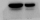

**Fig. 3E Vimentin**

L

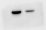

**Fig. 3E  $\beta$ -actin**

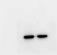

**Fig. 3F E-cadherin**

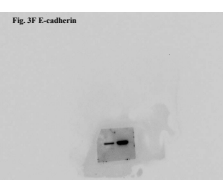

**Fig. 3F N-cadherin**

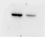

**Fig. 3F Vimentin**

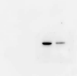



**Fig. 3F  $\beta$ -actin**

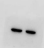

## Supplementary Fig.1E E-cadherin

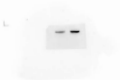

## Supplementary Fig.1E N-cadherin

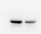

## Supplementary Fig.1E N-cadherin overexpression

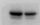

## Supplementary Fig.1E Vimentin

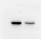

## Supplementary Fig.1E $\beta$ -actin

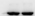

## Supplementary Fig.1F E-cadherin

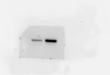

## Supplementary Fig.1F N-cadherin

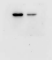



**Supplementary Fig.1F N-cadherin overexpression**

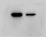

## Supplementary Fig.1F Vimentin



Western blot analysis showing Vimentin protein levels. The image displays a single horizontal band of Vimentin protein. The band is significantly darker and thicker on the left side of the blot, indicating a high concentration of Vimentin. On the right side, the band is very faint and thin, indicating a low concentration of Vimentin. The background of the blot is light gray, and the bands are dark gray/black.

## Supplementary Fig.1F Vimentin overexposure

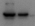

## Supplementary Fig.1F $\beta$ -actin

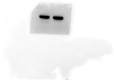

Supplement: pone.0229118.s003.pdf [file pone.0229118.s003.pdf]
